# Supplementary material for: Glycoproteogenomics characterizes the CD44 splicing code associated with bladder cancer invasion
Source: PubMed Central journal article supplement (PMC9065180; doi:10.7150/thno.67409), 2022-03-28
Supplement: thnov12p3150s1.pdf [file thnov12p3150s1.pdf]

# Glycoproteogenomics characterizes the CD44 splicing code associate with bladder cancer invasion

## -Supplementary figures and tables-

Cristiana Gaitero<sup>1,2,3,4,5</sup>, Janine Soares<sup>1,2,3,4,6</sup>, Marta Relvas-Santos<sup>1,2,3,4,7,8,9</sup>, Andreia Peixoto<sup>1,2,3,7,8</sup>, Dylan Ferreira<sup>1,2,3,4,5,7,8</sup>, Paula Paulo<sup>2,3,10</sup>, Andreia Brandão<sup>2,3,10</sup>, Elisabete Fernandes<sup>1,2,3,11</sup>, Rita Azevedo<sup>12</sup>, Carlos Palmeira<sup>1,2,3,11,13</sup>, Rui Freitas<sup>1,2,3,4,7,8</sup>, Andreia Miranda<sup>1,2,3,14</sup>, Hugo Osório<sup>7,14,15</sup>, Jesús Prieto<sup>5</sup>, Luís Lima<sup>1,2,3</sup>, André M. N. Silva<sup>9,16</sup>, Lúcio Lara Santos<sup>1,2,3,4,11,16,17</sup>, José Alexandre Ferreira<sup>1,2,3,4,16,a</sup>

<sup>1</sup>Experimental Pathology and Therapeutics Group, IPO Porto Research Center (CI-IPOP), Portuguese Oncology Institute (IPO Porto), 4200-072 Porto, Portugal; <sup>2</sup>RISE@CI-IPOP (Health Research Network), Portuguese Oncology Institute of Porto (IPO Porto), 4200-072 Porto, Portugal; <sup>3</sup>Porto Comprehensive Cancer Center (P.ccc), 4200-072 Porto, Portugal; <sup>4</sup>Institute of Biomedical Sciences Abel Salazar (ICBAS), University of Porto, 4050-013 Porto, Portugal; <sup>5</sup>Center for Applied Medical Research (Centro de Investigación Médica Aplicada, CIMA), University of Navarra, 31008 Pamplona, Navarra, Spain; <sup>6</sup>REQUIMTE-LAQV, Department of Chemistry, University of Aveiro, 3810-193 Aveiro, Portugal; <sup>7</sup>Institute for Research and Innovation in Health (i3S), University of Porto, 4200-135 Porto, Portugal; <sup>8</sup>Institute for Biomedical Engineering (INEB), University of Porto, 4200-135 Porto, Portugal; <sup>9</sup>REQUIMTE-LAQV, Department of Chemistry and Biochemistry, Faculty of Sciences of the University of Porto, 4169-007 Porto, Portugal; <sup>10</sup>Cancer Genetics Group, IPO Porto Research Center (CI-IPOP), Portuguese Oncology Institute (IPO Porto), 4200-072 Porto, Portugal; <sup>11</sup>FP-I3ID, University Fernando Pessoa, 4249-004 Porto, Portugal; <sup>12</sup>Laboratoire d'Etude du Métabolisme des Médicaments (LEMM), CEA, INRA, Université Paris Saclay, F-91191, Gif-sur-Yvette cedex, France; <sup>13</sup>Immunology Department, Portuguese Oncology Institute (IPO Porto), 4200-072 Porto, Portugal; <sup>14</sup>Faculty of Medicine of the University of Porto, 4200-319 Porto, Portugal; <sup>15</sup>Ipatimup—Institute of Molecular Pathology and Immunology of the University of Porto, University of Porto, 4200-135 Porto, Portugal; <sup>16</sup>GlycoMatters Biotech, 4500-162 Espinho, Portugal; <sup>17</sup>Department of Surgical Oncology, Portuguese Oncology Institute (IPO Porto), 4200-072 Porto, Portugal

### **<sup>a</sup>Corresponding author:**

José Alexandre Ferreira (jose.a.ferreira@ipoporto.min-saude.pt)

ORCID ID: <https://orcid.org/0000-0002-0097-6148>

Experimental Pathology and Therapeutics Group, Research Centre, Portuguese Oncology Institute of Porto, R. Dr. António Bernardino de Almeida 62, 4200-072 Porto, Portugal; Tel. +351 225084000 (ext. 5111).

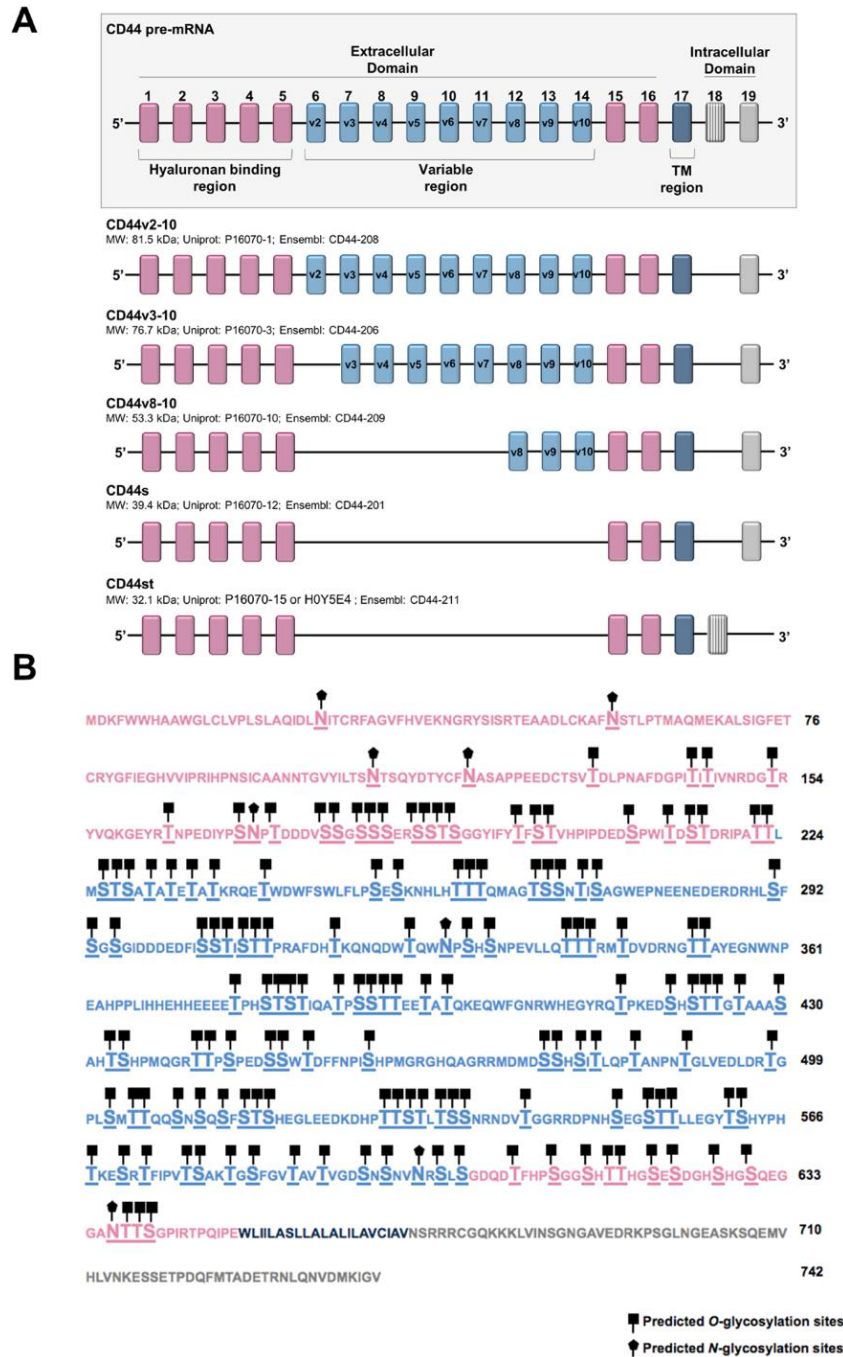

**Figure S1. A) Schematic representation of human CD44 pre-mRNA and experimentally confirmed isoforms resulting from alternative splicing and extensively explored in this study.** Exons generally regarded as conserved are represented in pink (constitutive exons e1-e5 and e15-e16), variable exons are represented in blue (exons v6-v14), the transmembrane region is represented in dark blue (exon e17), and the intracellular tail is represented in grey (exons e18-e19). Exon 18, filled with gray stripes, contains an early 3'UTR and is only present in the CD44st isoform. The estimated molecular weight for each variant (without posttranslational modifications), Uniprot and Ensemble codifications are also highlighted. **B) Amino acid sequence evidencing potential O- and N-glycosites.** O-glycosylation sites were predicted using the NetOGlyc 4.0 server (<http://www.cbs.dtu.dk/services/NetOGlyc/>) and N-glycosylation sites with the NetNGlyc 1.0 server (<http://www.cbs.dtu.dk/services/NetNGlyc/>). The different domains

of the protein are highlighted using the same color code as in panel A and evidences the high density of *O*-glycosites in comparison to *N*-glycosites, which is particularly evident in the variable region.

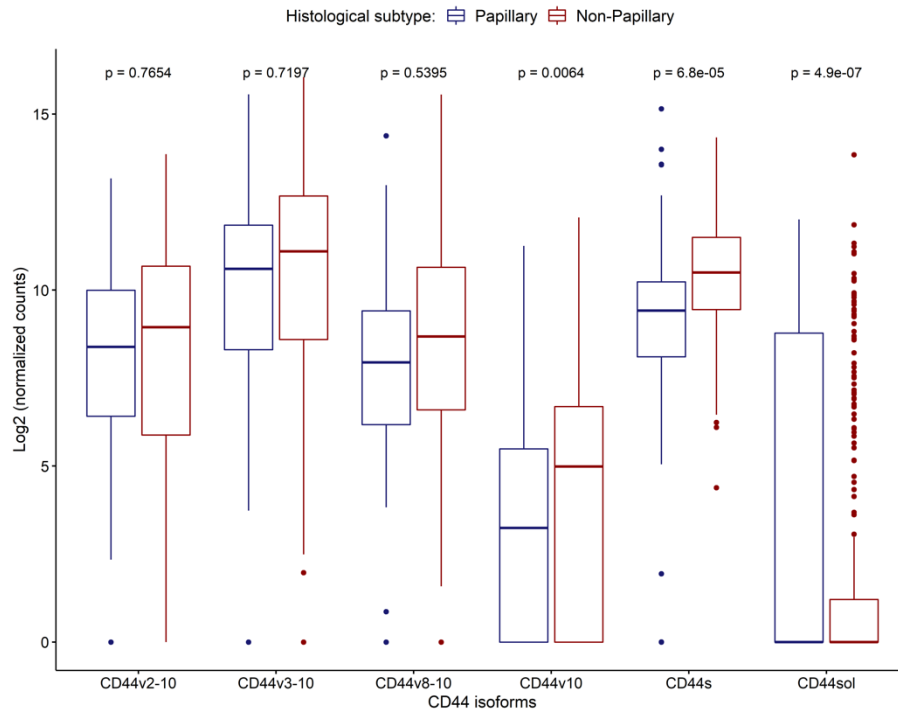

**Figure S2. CD44 variants expression according to the histological subtypes of TCGA muscle invasive bladder tumors.** Wilcoxon test revealed a significant overexpression of CD44s in more aggressive non-papillary lesions.

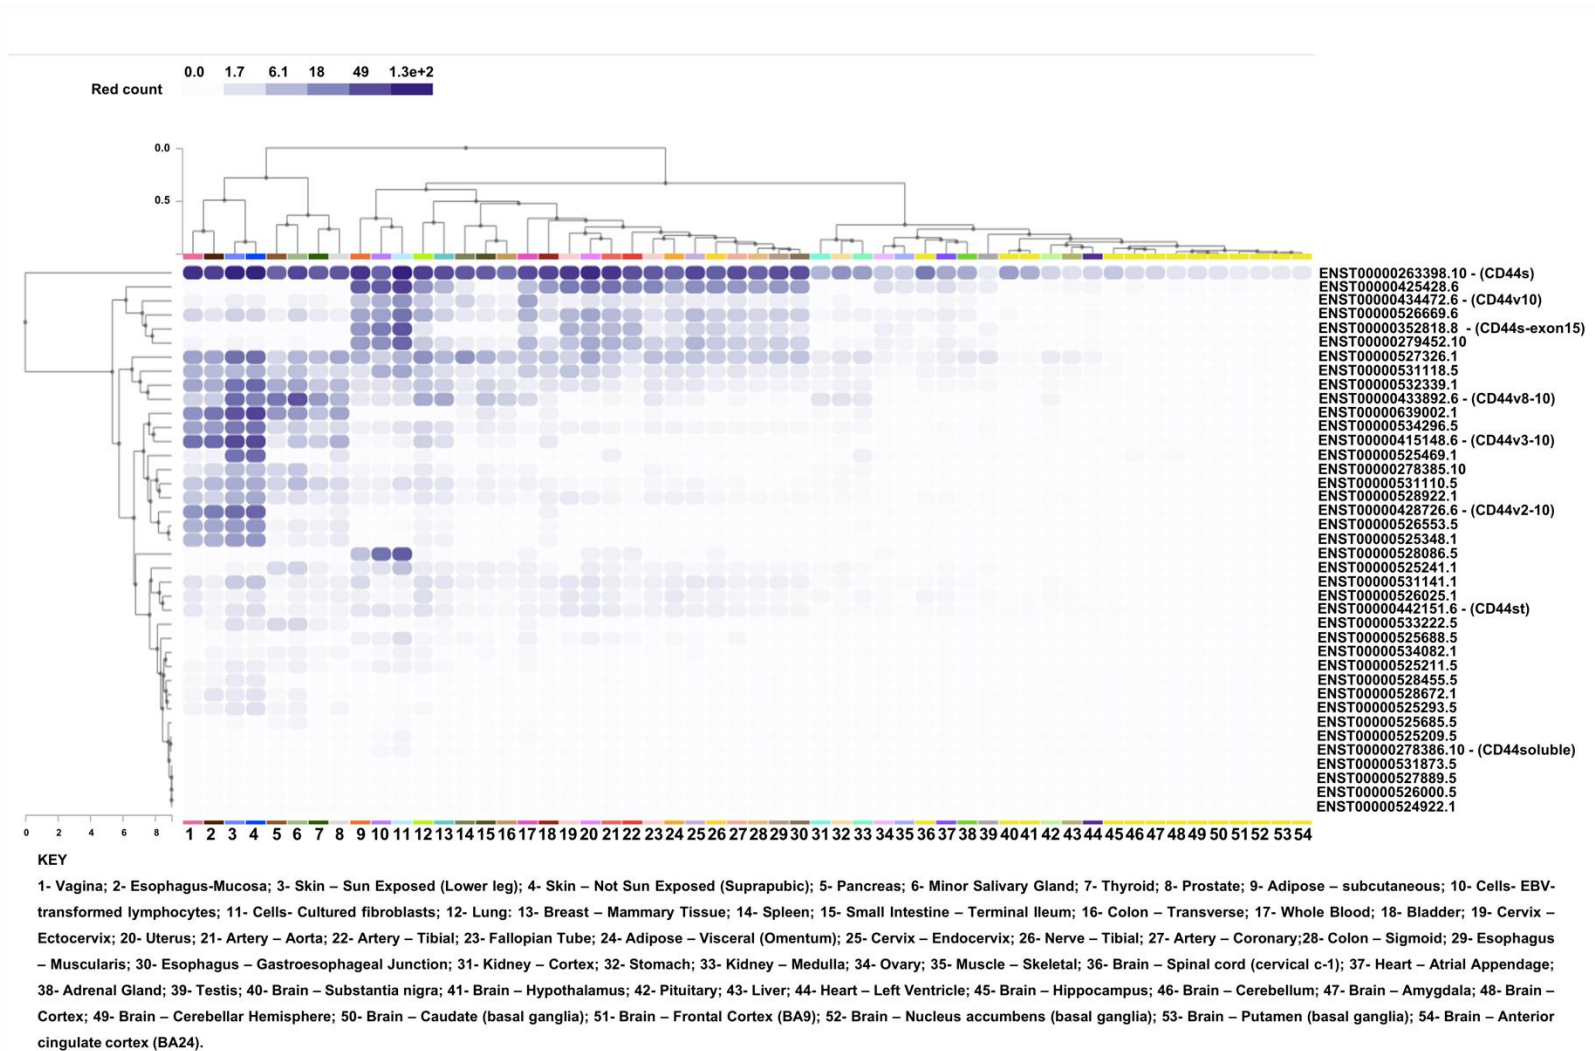

**Figure S3. CD44 splice variants expression in healthy human tissues.** Transcriptomics analysis of healthy tissues for CD44 isoforms were obtained and adapted from the GTEx Portal on 03/26/21 and/or dbGaP accession number phs000424.v8.p2. The Figure shows the complex mosaicism of CD44 mRNA in healthy tissues, including the co-expression of multiple isoforms in the same tissue. It highlights that CD44s is not expressed in healthy organs. Moreover, CD44st that differs from CD44s in terms of cytoplasmic tail but presents a similar extracellular domain was detected in low abundance in a restricted number of cells/organs, mostly from the skin, fibroblasts, subcutaneous adipocytes, the female reproductive system, the esophagus and breast. On the other hand, CD44s related structures lacking exon 15 (CD44s-exon 15) was present in high abundance in adipose tissues, fibroblasts, lungs, blood cells, across the female reproductive system and the gastrointestinal tract.

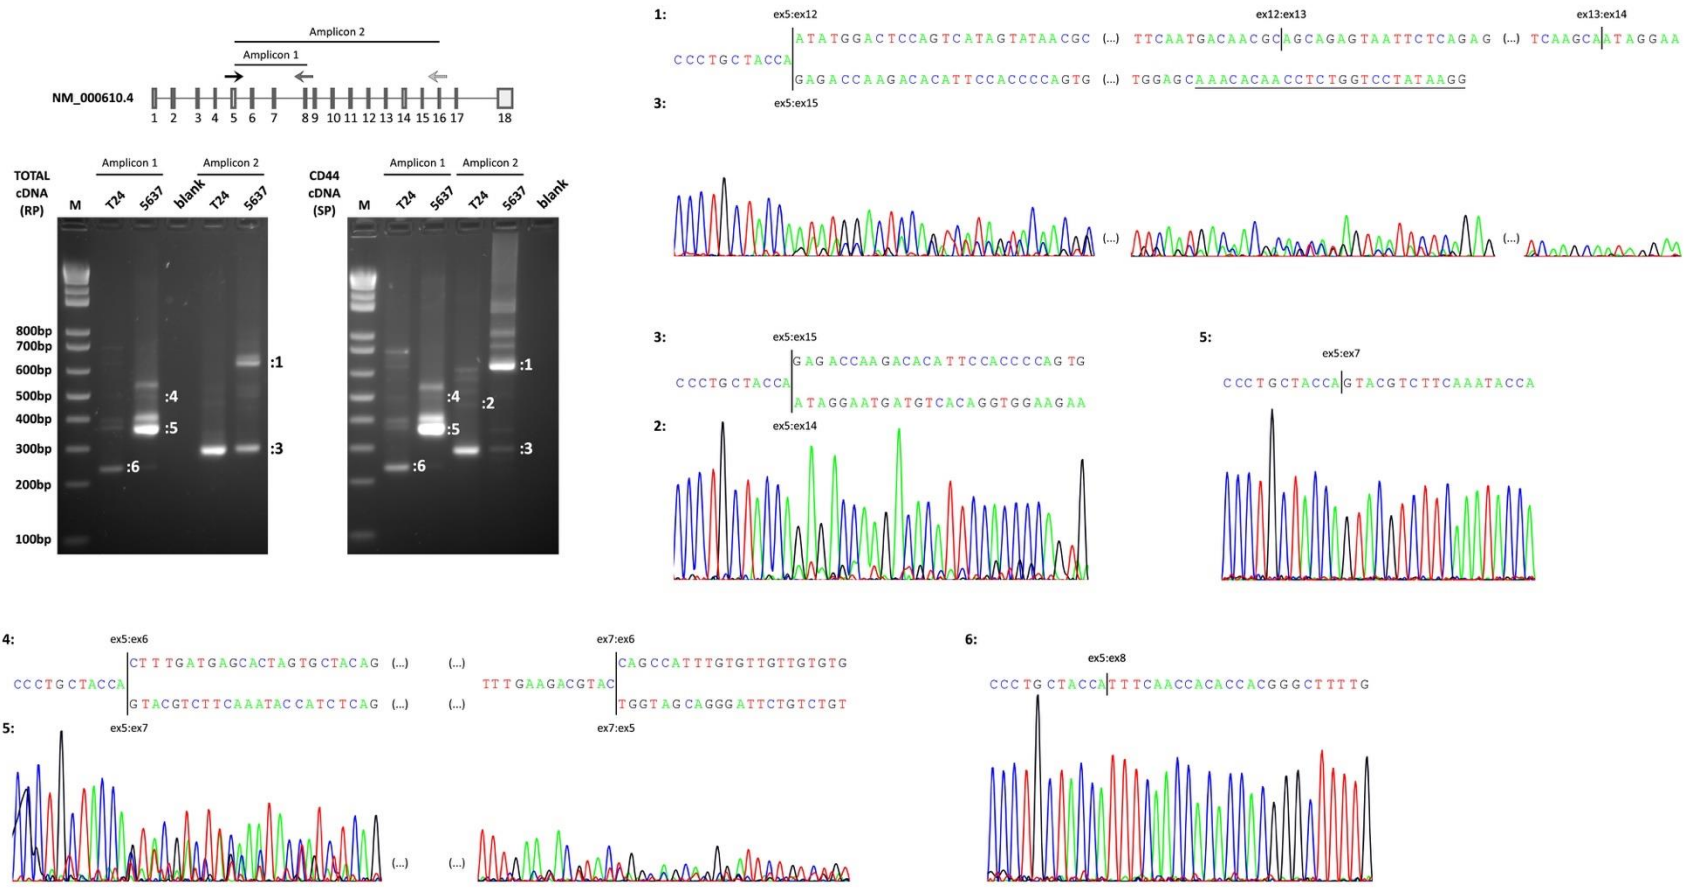

**Figure S4. Reverse Transcriptase-Polymerase Chain Reaction and Sanger Sequencing for the *CD44* gene using random primer (RP) and e16 specific primer amplification.** Two amplicons have been used: amplicon 1: e5-v4; amplicon 2: e5-e16. According to these experiments, 5637 were enriched longer isoforms in relation to T24 cells. However, we could not identify the precise nature of the long isoforms by sanger sequencing, most likely because of mixture of different isoforms. Supporting the distinct splicing codes presented by these cell lines, the following differences were observed: **e5-v8-v9-v10-(...)-e16 (band 1):** 5637 (main band)>T24; **e5-v10-(...)-e16 (band 2):** only in T24; **e5-e15-(...)-e16 (band 3):** T24 (main band; most likely corresponding to CD44s and/or st)>5637; **e5-v2-v3-(...)-e16 (band 4):** only in 5637; **e5-v3-v4-(...)-e16 (band 5):** 5637>T24; **e5-v4-(...)-e16 (band 6):** only in T24.





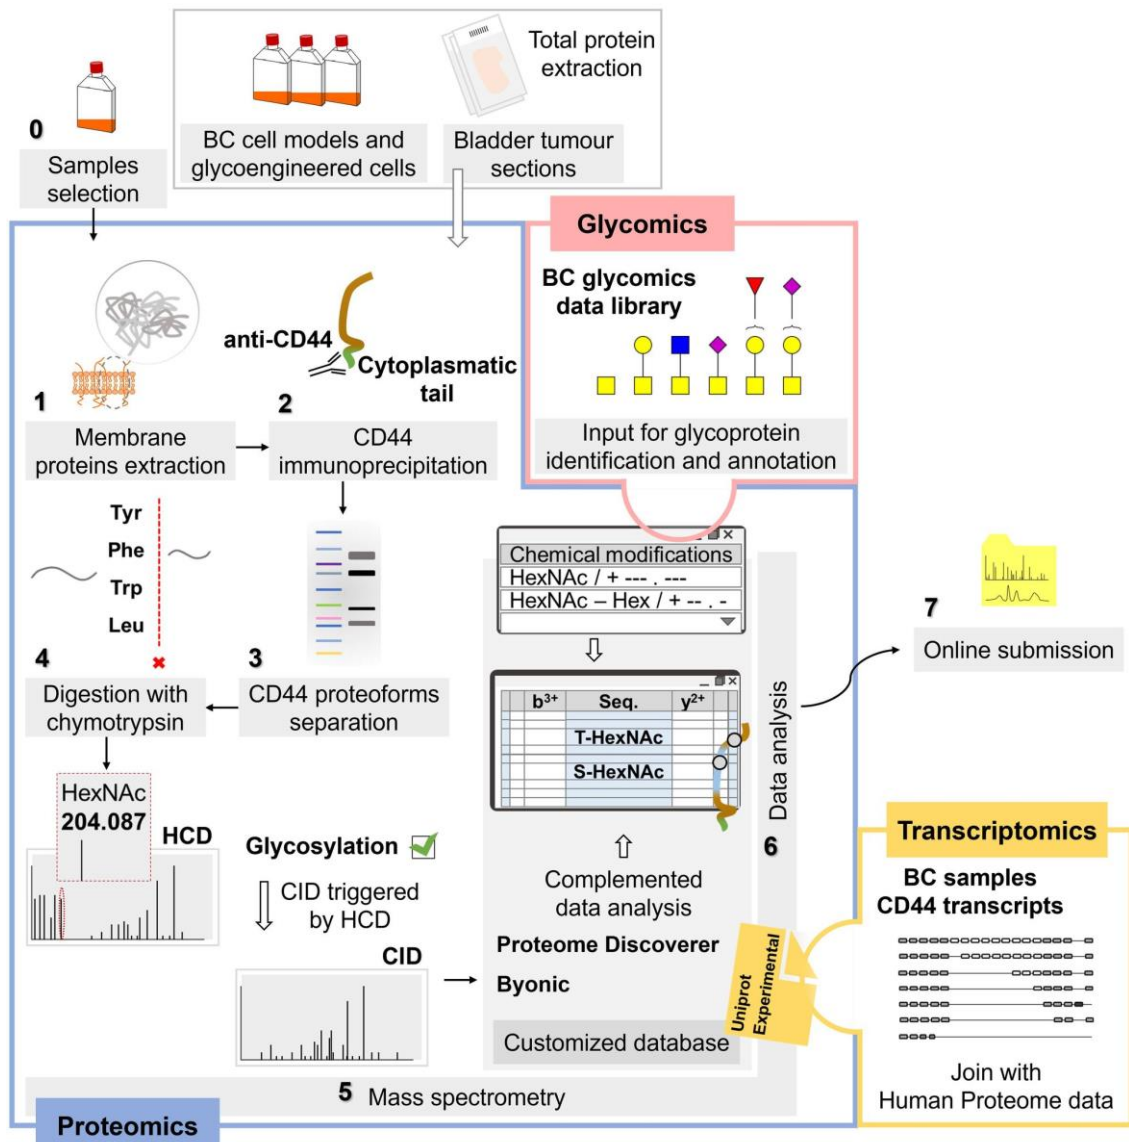

**Figure S5. Glycoproteogenomics workflow for identification of CD44 glycoproteoforms.** Briefly, bladder cancer cell models, glycoengineered cells and tumor tissue sections were used as starting material. **1.** Membrane glycoproteins from cell lines are isolated by differential ultracentrifugation. **2.** CD44 is immunoprecipitated using a monoclonal antibody targeting the cytoplasmatic tail domain expressed by most CD44 isoforms. **3.** CD44-IP enriched extracts were then digested with sialidase, separated by gradient SDS-PAGE electrophoresis. **4.** Bands are excised from the gels, proteins are reduced, alkylated, and digested with chymotrypsin *in gel*. **5.** Chymotrypsin digests are analyzed by nanoLC-MS/MS (HCD-MS2 and CID-MS2 with a dependent acquisition based on HCD detection of HexNAc oxonium ion at  $m/z$  204.087). **6.** Glycoproteoforms identification using a glycoproteogenomics approach. RNAseq was used to identify CD44 isoforms expressed by 5637 and T24 cells. Predicted protein sequences were included in a database together with the human proteome from Uniprot database and used for protein identification in the Proteome Discoverer bioinformatics platform. Glycomics analysis was performed in parallel to determine the glycan structures that may be present as variable CD44 post-translational modification. This information was included upon protein identification and glycopeptides annotation by MS/MS.



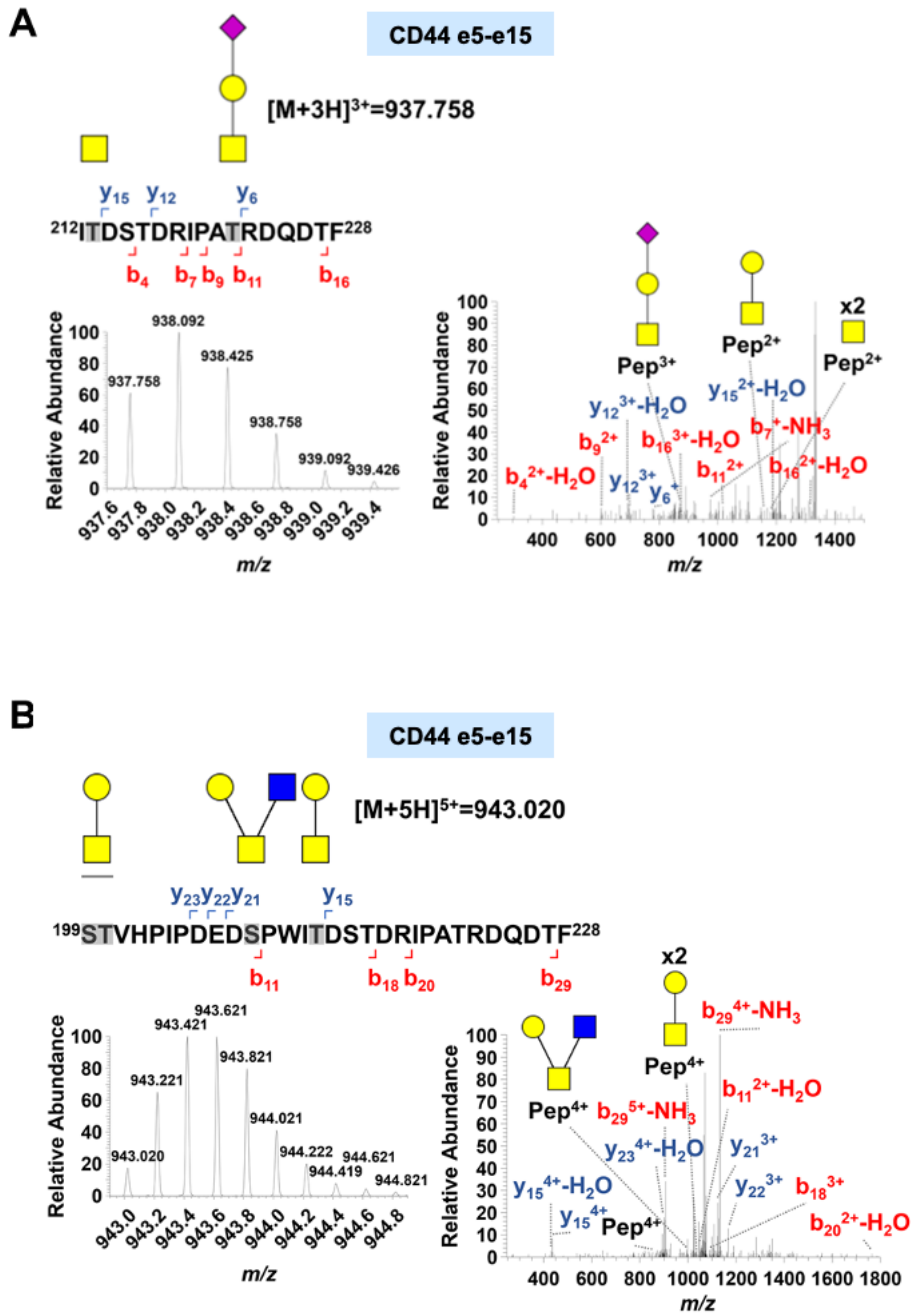

**Figure S6. CID spectra for CD44s glycopeptides carrying *O*-glycans identified in T24 cells. A) CID spectrum for CD44s-Tn/ST and B) CD44s-T/core 2 glycopeptides. CD44s glycopeptides carrying these *O*-glycans were identified by CID based on an HCD data dependent acquisition. Briefly, species presenting HCD product ion spectrum with an HexNAc fragment at  $m/z$  204.087 were elected for CID fragmentation. CID spectra confirmed the glycan structures and presented several *y*- and *b*-series peptide fragments that helped supporting glycosites assignment (highlighted in grey in the peptide sequence). Collectively, these spectra confirm the presence of the illustrated *O*-glycans in CD44s from T24 cells and the heterogeneous nature of glycosylation at the peptide level.**

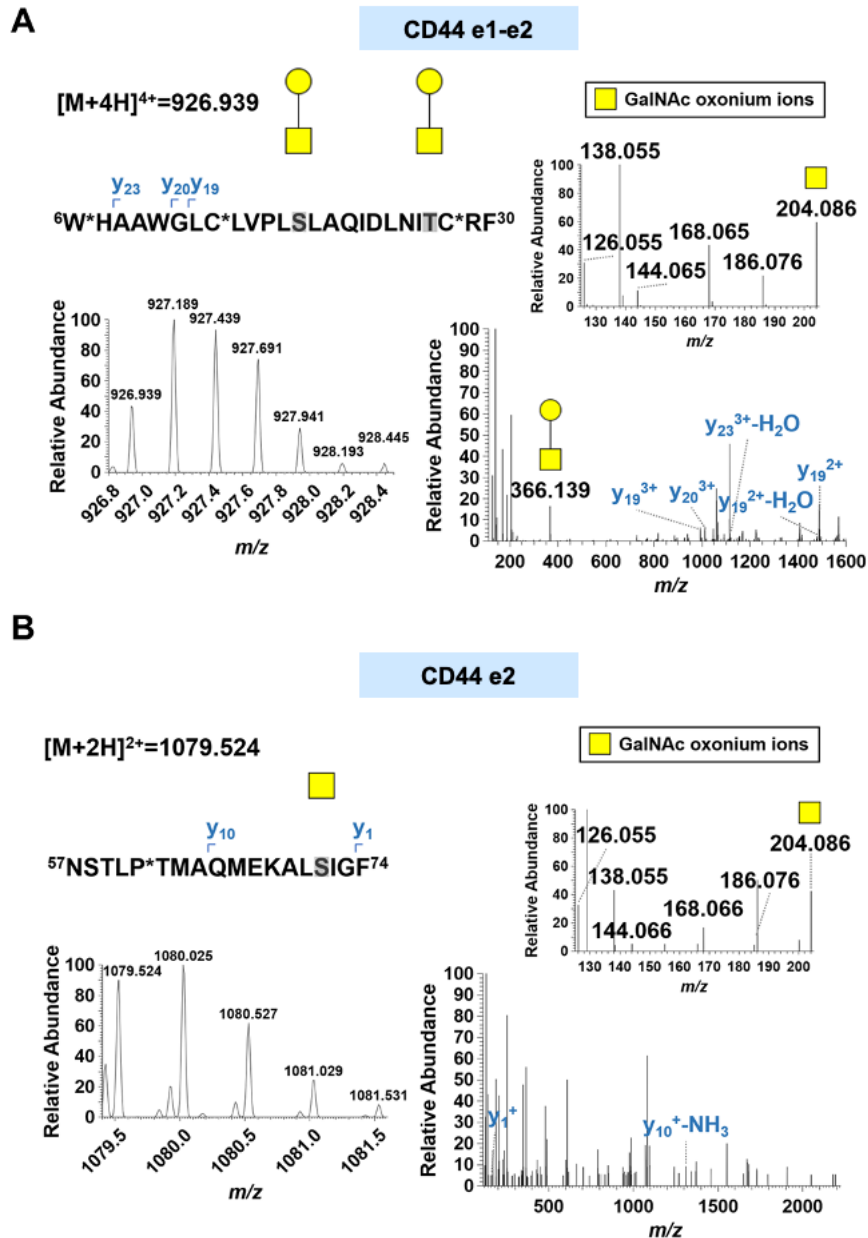

**Figure S7. A) CD44-T and B) Tn glycopeptides belonging to the conserved extracellular domain in different isoforms identified in muscle invasive bladder tumors by nanoLC-HCD-MS/MS. Both MS/MS spectra present the HexNAc oxonium ions, namely the ion at  $m/z$  204.086. The MS/MS spectrum of the CD44-T glycopeptide also presents an evident ion at  $m/z$  366.139, corresponding to the oxonium ion for the T antigen.  $y$ -series ions resulting from peptide backbone fragmentation were also highlighted. The sequence of the glycopeptide presents the glycosites identified in grey. The symbol \* corresponds to amino acid modifications: W – hydroxykynurenine; C – carbamidomethyl; P – glutamic semialdehyde.**

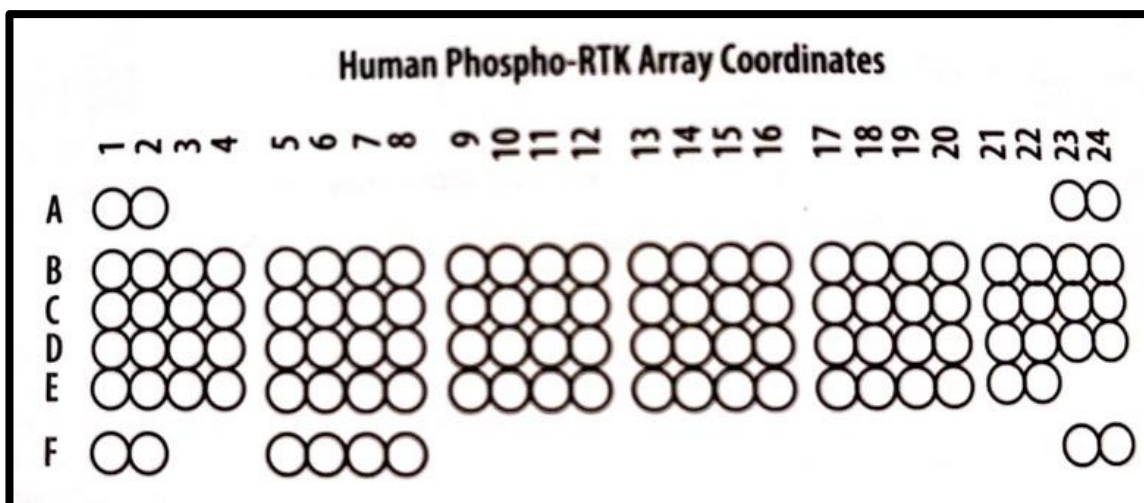

| Coordinate | Receptor Family | RTK/Control     |
|------------|-----------------|-----------------|
| A1, A2     | Reference Spots | -               |
| B1, B2     | Reference Spots | -               |
| B3, B4     | EGF R           | EGF R           |
| B5, B6     | EGF R           | ErbB2           |
| B7, B8     | EGF R           | ErbB4           |
| B9, B10    | FGF R           | FGF R1          |
| B11, B12   | FGF R           | FGF R2 $\alpha$ |
| B13, B14   | FGF R           | FGF R3          |
| B15, B16   | FGF R           | FGF R4          |
| B17, B18   | Insulin R       | Insulin R       |
| B19, B20   | Insulin R       | IGF-I R         |
| B21, B22   | Axl             | Axl             |
| B23, B24   | Axl             | Dtk             |
| C1, C2     | Axl             | Mer             |
| C3, C4     | HGF R           | HGF R           |
| C5, C6     | HGF R           | MSP R           |
| C7, C8     | PDGF R          | PDGF R $\alpha$ |
| C9, C10    | PDGF R          | PDGF R $\beta$  |
| C11, C12   | PDGF R          | SCF R           |
| C13, C14   | PDGF R          | Flt-3           |
| C15, C16   | PDGF R          | M-CSF R         |
| C17, C18   | RET             | c-Ret           |
| C19, C20   | ROR             | ROR1            |
| C21, C22   | ROR             | ROR2            |
| C23, C24   | Tie             | Tie-1           |
| D1, D2     | Tie             | Tie-2           |
| D3, D4     | NGF R           | TrkA            |
| D5, D6     | NGF R           | TrkB            |
| D7, D8     | NGF R           | TrkC            |
| D9, D10    | VEGF R          | VEGF R1         |
| D11, D12   | VEGF R          | VEGF R2         |
| D13, D14   | VEGF R          | VEGF R3         |
| D15, D16   | MuSK            | MuSK            |

|                 |                 |        |
|-----------------|-----------------|--------|
| <b>D17, D18</b> | Eph R           | EphA1  |
| <b>D19, D20</b> | Eph R           | EphA2  |
| <b>D21, D22</b> | Eph R           | EphA3  |
| <b>D23, D24</b> | Eph R           | EphA4  |
| <b>E1, E2</b>   | Eph R           | EphA6  |
| <b>E3, E4</b>   | Eph R           | EphA7  |
| <b>E5, E6</b>   | Eph R           | EphB1  |
| <b>E7, E8</b>   | Eph R           | EphB2  |
| <b>E9, E10</b>  | Eph R           | EphB4  |
| <b>E11, E12</b> | Eph R           | EphB6  |
| <b>E13, E14</b> | Insulin R       | ALK    |
| <b>E15, E16</b> | -               | DDR1   |
| <b>E17, E18</b> | -               | DDR2   |
| <b>E19, E20</b> | Eph R           | EphA5  |
| <b>E21, E22</b> | Eph R           | EphA10 |
| <b>F1, F2</b>   | Reference spots | -      |
| <b>F5, F6</b>   | Eph R           | Ephb3  |
| <b>F7, F8</b>   | -               | RYK    |
| <b>F23, F24</b> | Control (-)     | PBS    |

**Figure S8. The human phospho-receptor tyrosine kinase (Phospho-RTK) array coordinates.** The phospho-array presents capture and control antibodies spotted in duplicates for the 49 different phosphorylated human RTKs, which are represented by alpha-numeric coordinates.

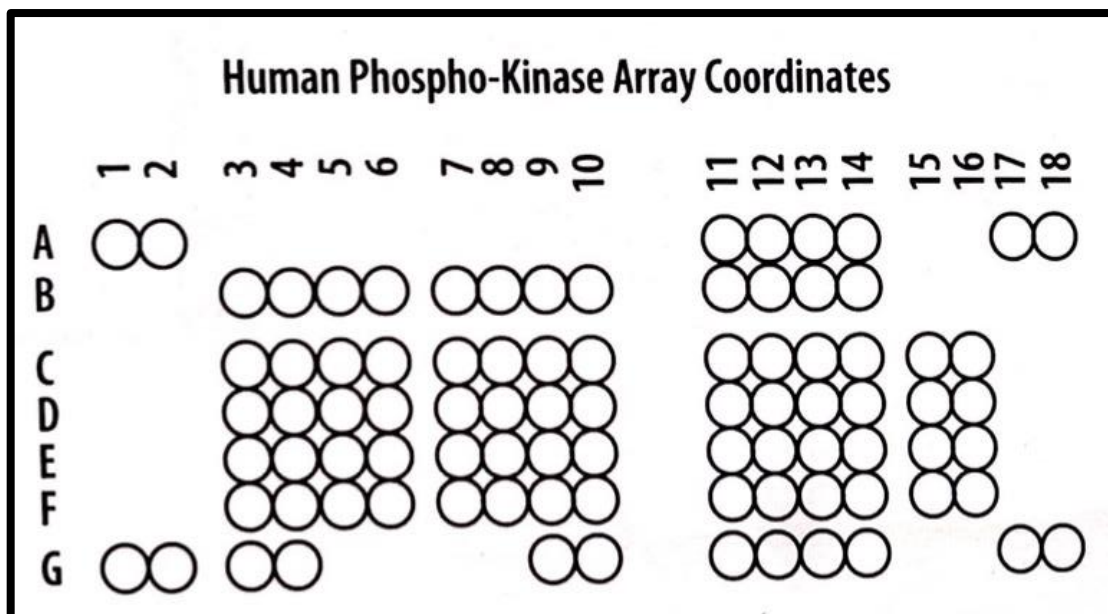

| Coordinate | Target/Control       | Phosphorylation Site |
|------------|----------------------|----------------------|
| A1, A2     | Reference Spot       | -                    |
| A11,A12    | Akt 1/2/3            | T308                 |
| A13, A14   | Akt 1/2/3            | S473                 |
| A17, A18   | Reference Spot       | -                    |
| B3, B4     | CREB                 | S133                 |
| B5, B6     | EGF R                | Y1086                |
| B7, B8     | eNOS                 | S1177                |
| B9, B10    | ERK 1/2              | T202/Y204, T185/Y187 |
| B11, B12   | Chk-2                | T68                  |
| B13, B14   | c-Jun                | S63                  |
| C3, C4     | Fgr                  | Y412                 |
| C5, C6     | GSK-3 $\alpha/\beta$ | S21/S9               |
| C7, C8     | GSK-3 $\beta$        | S9                   |
| C9, C10    | HSP27                | S78/S82              |
| C11, C12   | p53                  | S15                  |
| C13, C14   | p53                  | S46                  |
| C15, C16   | p53                  | S392                 |
| D3, D4     | JNK 1/2/3            | T183/Y185, T221/Y223 |
| D5, D6     | Lck                  | Y394                 |
| D7, D8     | Lyn                  | Y397                 |
| D9, D10    | MSK 1/2              | S376/S360            |
| D11, D12   | p70 S6 Kinase        | T389                 |
| D13, D14   | p70 S6 Kinase        | T421/S424            |
| D15, D16   | PRAS40               | T246                 |
| E3, E4     | p38 $\alpha$         | T180/Y182            |
| E5, E6     | PDGF R $\beta$       | Y751                 |
| E7, E8     | PLC- $\gamma$ 1      | Y783                 |
| E9, E10    | Src                  | Y419                 |
| E11, E12   | PYK2                 | Y402                 |
| E13, E14   | RSK 1/2              | S221/S227            |

|                 |                  |                |
|-----------------|------------------|----------------|
| <b>E15, E16</b> | RSK 1/2/3        | S380/S386/S377 |
| <b>F3, F4</b>   | STAT2            | Y689           |
| <b>F5, F6</b>   | STAT5a/b         | Y694/Y699      |
| <b>F7, F8</b>   | WNK1             | T60            |
| <b>F9, F10</b>  | Yes              | Y426           |
| <b>F11, F12</b> | STAT1            | Y701           |
| <b>F13, F14</b> | STAT3            | Y705           |
| <b>F15, F16</b> | STAT3            | S727           |
| <b>G1, G2</b>   | Reference Spot   | -              |
| <b>G3, G4</b>   | $\beta$ -Catenin | -              |
| <b>G9, G10</b>  | PBS (Control -)  | -              |
| <b>G11, G12</b> | STAT6            | Y641           |
| <b>G13, G14</b> | HSP60            | -              |
| <b>G17, G18</b> | PBS (Control -)  | -              |

**Figure S9. The human phospho-kinase array coordinates.** The phospho-array presents capture and control antibodies spotted in duplicates for the detection of the relative levels of phosphorylation of 37 kinase phosphorylation sites and 2 related total proteins represented by alpha-numeric coordinates.

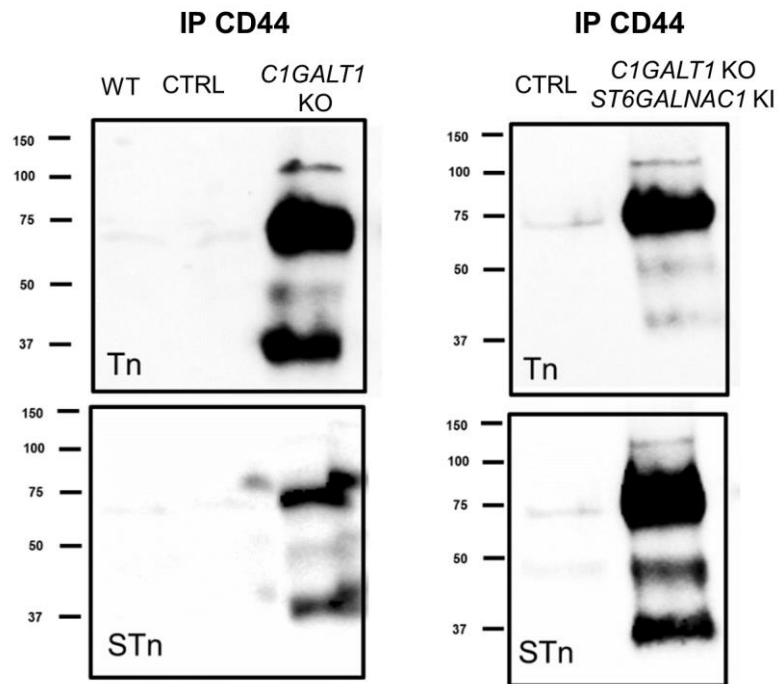

**Figure S10. Western Blots show co-expression of CD44 and short-chain *O*-glycans, namely STn and Tn, in glycoengineered T24 cells.** CD44 was immunoprecipitated from membrane protein extracts of T24 *C1GALT1* KO, T24 *C1GALT1* KO/*ST6GALNAC1* KI and corresponding controls and then blotted for STn, Tn, and CD44. A demarked expression of CD44-STn and CD44-Tn was detected for both cell model mainly in bands at 75 kDa and bellow.



CD44 e5

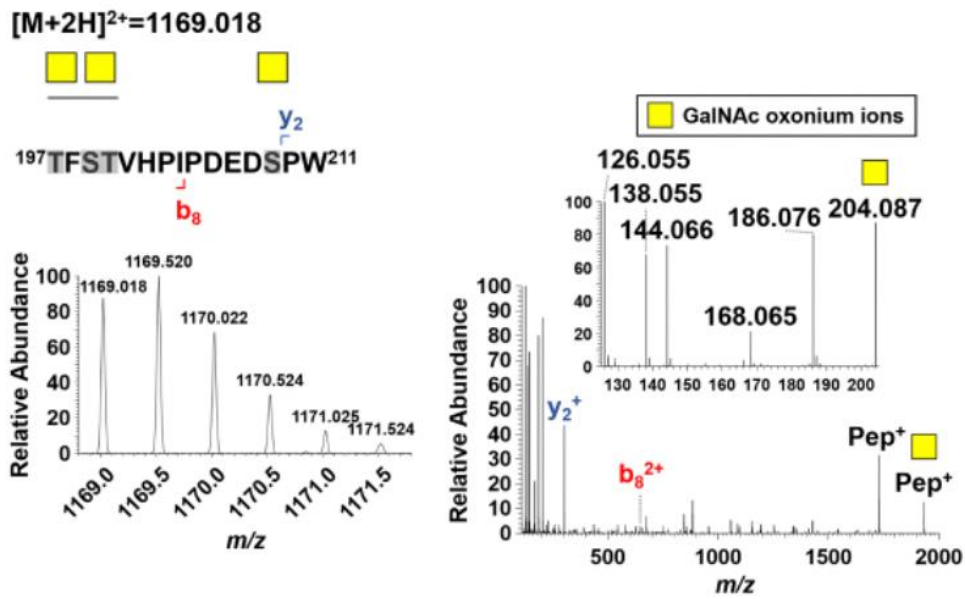

**Figure S11. CD44-Tn glycopeptides belonging to the conserved extracellular domain identified in T24 CIGALTIKO cells by nanoLC-HCD-MS/MS.** MS/MS spectrum highlights the typical HexNAC oxonium ion ( $m/z$  204.087) as well as other oxonium ion fragments consistent with GalNAc (highlighted at  $m/z$  138.055 and 144.066). The MS/MS spectrum of the CD44-Tn glycopeptide also highlights peptide ions with GalNAc losses. The predicted and possible glycosites are identified in grey.

**Table S1. Tailored-made Taqman Gene Expression Assay ID's to specifically detect mRNA encoding for total CD44 and 4 splicing variants.**

| <b>Gene</b>        | <b>TaqMan Gene Expression Assay ID</b> | <b>Exon junction Boundary</b>                     | <b>Interrogated sequences</b>                                                                                                                                                                                                                                                                                                                |
|--------------------|----------------------------------------|---------------------------------------------------|----------------------------------------------------------------------------------------------------------------------------------------------------------------------------------------------------------------------------------------------------------------------------------------------------------------------------------------------|
| <b>CD44 Total</b>  | Hs01075864_m1                          | e3-e4                                             | NM_000610.3 (CD44 v2-10: ENST00000428726.8)<br>NM_001001389.1 (CD44 v3-10: ENST00000415148.6)<br>NM_001001390.1 (CD44 v8-10: ENST00000433892.6)<br>NM_001001391.1(CD44s: ENST00000263398.11)<br>NM_001202555.1 (CD44v10: ENST00000434472.6)<br>NM_001202556.1(CD44s-exon15: ENST00000352818.8)<br>NM_001202557.1 (CD44st: ENST00000442151.6) |
| <b>CD44 e5-v2</b>  | Hs01075866_m1                          | e5-v6 (corresponds to exon v2 of canonical CD44)  | NM_000610.3 (CD44 v2-10: ENST00000428726.8)                                                                                                                                                                                                                                                                                                  |
| <b>CD44 e5-v3</b>  | Hs01081480_m1                          | e5-v6 (corresponds to exon v3 of canonical CD44)  | NM_001001389.1 (CD44 v3-10: ENST00000415148.6)                                                                                                                                                                                                                                                                                               |
| <b>CD44 e5-v8</b>  | Hs01081475_m1                          | e5-v6 (corresponds to exon v8 of canonical CD44)  | NM_001001390.1 (CD44 v8-10: ENST00000433892.6)                                                                                                                                                                                                                                                                                               |
| <b>CD44 e5-e15</b> | Hs01081473_m1                          | e5-v6 (corresponds to exon e15 of canonical CD44) | NM_001001391.1 (CD44s: ENST00000263398.11)<br>NM_001202557.1 (CD44st: ENST00000442151.6)                                                                                                                                                                                                                                                     |

|                |               |                         |                                              |
|----------------|---------------|-------------------------|----------------------------------------------|
| <b>CD44sol</b> | Hs01081469_m1 | v2(partial)-v3(partial) | NM_001001392.1 (CD44sol: ENST00000278386.10) |
|----------------|---------------|-------------------------|----------------------------------------------|

**Table S2. List of antibodies and lectins used in this manuscript.**

| Antigen                                                                    | Antibody/Lectin                           | Source              | Reference             | Clone        | Immunogens/targets                                                                                              |
|----------------------------------------------------------------------------|-------------------------------------------|---------------------|-----------------------|--------------|-----------------------------------------------------------------------------------------------------------------|
| <b>CD44</b>                                                                | Rabbit polyclonal to CD44 antibody        | Abcam               | ab157107              | Not provided | Synthetic peptide within Human CD44 a.a 650-750                                                                 |
| <b>STn</b>                                                                 | Mouse monoclonal to tag 72                | Abcam               | ab199002              | B72.3+CC49   | Membrane-enriched fraction of a human breast carcinoma liver metastasis [B72.3]; Purified TAG-72 protein [CC49] |
| <b>Tn</b>                                                                  | Biotinylated and FITC-labeled VVA lectin  | Vector Laboratories | B-1235-2<br>FL-1231-2 | Not provided | $\alpha$ - or $\beta$ -linked terminal N-acetylgalactosamine structures                                         |
| <b>T and ST after desialylation with <math>\alpha</math>-neuraminidase</b> | FITC-labeled PNA lectin                   | Vector Laboratories | FL-1071               | Not provided | Gal ( $\beta$ -1,3) GalNAc structures                                                                           |
| <b>B2M</b>                                                                 | Rabbit monoclonal to beta 2 Microglobulin | Abcam               | ab75853               | EP2978Y      | Not provided                                                                                                    |

**Table S3. CD44 isoforms identified in 5637 and T24 cells by RNAseq.**

| <b>Ensembl</b>     | <b>Uniprot</b>      | <b>CD44 Isoforms</b> |
|--------------------|---------------------|----------------------|
| ENST00000263398.11 | P16070-12           | <b>CD44s</b>         |
| ENST00000526025.2  | E9PKC6              | <b>CD44splice E2</b> |
| ENST00000415148.6  | P16070-4            | <b>CD44v3-10</b>     |
| ENST00000428726.8  | P16070-1            | <b>CD44v2-10</b>     |
| ENST00000433892.6  | P16070-10           | <b>CD44v8-10</b>     |
| ENST00000278386.10 | P16070-19           | <b>CD44sol</b>       |
| ENST00000434472.6  | P16070-11           | <b>CD44v10</b>       |
| ENST00000352818.8  | P16070-18           | <b>CD44s-exon15</b>  |
| ENST00000442151.6  | P16070-15 or H0Y5E4 | <b>CD44st</b>        |
| ENST00000526669.6  | H0YD13              | -                    |
| ENST00000425428.6  | Q86UZ1              | -                    |
| ENST00000528086.5  | -                   | -                    |
| ENST00000526000.6  | H0YDW7              | -                    |
| ENST00000279452.10 | H0Y2P0              | -                    |
| ENST00000531118.5  | -                   | -                    |
| ENST00000528455.5  | H0YD17              | -                    |
| ENST00000531873.5  | H0YD90              | -                    |
| ENST00000525209.5  | -                   | -                    |

**Table S4. Glycopeptides identified by nanoLC-HCD/CID-MS/MS in glycoproteogenomics settings for 5637 cells.**

| Peptide sequences              | 5637          |             |           |                |                   |           |              |                      |                    |   |
|--------------------------------|---------------|-------------|-----------|----------------|-------------------|-----------|--------------|----------------------|--------------------|---|
|                                | Glycan chains |             |           |                |                   |           |              |                      |                    |   |
|                                | HexNAc        | HexNAcNeuAc | HexHexNAc | HexHexNAcNeuAc | HexHexNAcNeuAc(2) | HexNAc(2) | HexNAc(2)Hex | HexNAc(2)Hex(2)NeuAc | HexNAc(1)Hex(1)Fuc |   |
| <b>CD44v2-10</b>               |               |             |           |                |                   |           |              |                      |                    |   |
| LFLPSESKNHLHTTTQMAGTSnTISAGW   |               |             | x         |                |                   |           | x            |                      |                    |   |
| IPsEsKNHLHTTTQMAGTSSNTISAGW    | x             |             | x         |                |                   |           |              |                      |                    |   |
| LFLPSESKNHLHTTTQMAGTSnTIsAGW   | x             |             | x         |                |                   |           |              |                      |                    |   |
| LFLPSESKNHLHttQMAGTSSnTISAGW   |               |             | x         |                |                   |           |              |                      |                    |   |
| DWFsW                          |               |             |           |                |                   |           |              |                      |                    | x |
| FsWLF                          |               |             |           |                |                   |           |              |                      |                    | x |
| LFLPSESKNHLHTTTQMAGTSSNTISAGW  |               |             |           |                | x                 |           |              |                      |                    |   |
| dWFsW                          |               |             |           |                | x                 |           |              |                      |                    |   |
| FsWLF                          |               |             |           |                |                   |           |              |                      |                    |   |
| LFLPSESKnHLHTTTQmAGtSSnTISAGW  | x             |             |           |                |                   | x         |              |                      |                    |   |
| fsWLF                          |               |             |           |                |                   |           |              | x                    |                    |   |
| FsWLF                          |               |             |           |                |                   |           |              | x                    |                    |   |
| LFLPSESKNHLHTTTQmAGtSSNTIsAGW  | x             |             |           |                |                   |           | x            |                      |                    |   |
| DWFsW                          |               |             | x         |                |                   |           |              |                      |                    |   |
| LFLPsEsKNHLHTTTQmAGTSSNTISAGW  |               |             |           |                |                   | x         |              |                      |                    |   |
| LPsEsKNHLHTTTQMAGTSSNTISAGW    |               |             |           |                |                   |           |              |                      |                    |   |
| LPSESKNHLHTTTQMAGTSSNTIsAGW    |               |             |           |                |                   |           |              |                      |                    |   |
| LFLPsEsKNHLHTTTQmAGTSSNTISAGW  |               |             |           |                |                   |           |              |                      |                    |   |
| LFLPSESKnHLHttQMAGTSSNTISAGW   |               |             |           |                |                   |           |              |                      |                    |   |
| LPSESKnHLHttQMAGTSSNTISAGW     |               |             |           |                |                   |           |              |                      |                    |   |
| LPSESKnHLHttQMAGTSSNTISAGW     |               |             |           |                |                   |           |              |                      |                    |   |
| LPSESKnHLHTTTQmAGTSSNTISAGW    |               |             |           |                |                   |           |              |                      |                    |   |
| LFLPsEsKNHLHTTTQMAGTSSNTISAGW  |               |             |           |                |                   |           |              |                      |                    |   |
| LFLPSEsKNHLHTTTQmAGTsNTISAGW   |               |             |           |                |                   |           |              |                      |                    |   |
| LFLPsEsKNHLHTTTQmAGTSSNTISAGW  |               |             |           |                |                   |           |              |                      |                    |   |
| LPSESKNHLHTTTQmAGTSSNTISAGW    |               |             |           |                |                   |           |              |                      |                    |   |
| sWLF                           |               |             |           |                |                   |           |              |                      |                    |   |
| sWLF                           |               |             |           |                |                   |           |              |                      |                    |   |
| FsWLF                          |               |             |           |                |                   |           |              |                      |                    |   |
| LFLPsEsKnHLHTTTQMAGTSSNTISAGW  |               |             |           |                |                   |           |              |                      |                    |   |
| STVHPiPEDESPWITDsTDRIPAtRDQDTf |               |             |           |                |                   |           |              |                      |                    |   |
| dWFsW                          |               | x           |           |                |                   |           |              |                      |                    |   |
| sWLF                           |               |             |           |                |                   |           |              |                      |                    |   |
| FsWLF                          |               |             |           |                |                   |           |              |                      |                    |   |
| DWFsW                          |               |             |           |                |                   |           |              |                      |                    |   |
| FsWLF                          |               |             |           |                |                   |           |              |                      |                    |   |
| DWFsW                          |               |             |           |                |                   |           |              |                      |                    |   |
| <b>CD44v3-10</b>               |               |             |           |                |                   |           |              |                      |                    |   |
| ItDSTDRIPATSTSSnTISAGW         |               |             |           |                |                   |           |              |                      |                    |   |
| ItDSTDRIPAtStSSNTISAGW         |               |             |           |                |                   |           |              |                      |                    |   |
| ITDSTDRIPATStSSNTISAGW         |               |             |           |                |                   |           |              |                      |                    |   |
| ITDSTDRIPATSTsNTIsAGW          |               | x           |           |                |                   |           |              |                      |                    | x |
| ITDsTDRIPATSTsNTIsAGW          | x             |             |           | x              |                   |           | x            |                      |                    |   |
| ITDsTDRIPATSTsNTIsAGW          |               |             |           | x              |                   |           | x            |                      |                    |   |
| ITDSTDRIPATSTsNTISAGW          |               |             |           | x              |                   |           |              |                      |                    |   |
| ITDSTDRIPATSTsNTISAGW          | x             |             |           |                |                   |           |              |                      |                    |   |
| ITDSTDRIPAtStSSnTIsAGW         | x             |             |           | x              |                   |           |              |                      |                    |   |
| ITDSTDRIPATSTsNTIsAGW          | x             |             |           |                |                   |           |              |                      |                    |   |
| ITDSTDRIPATSTsNTIsAGW          |               |             |           |                |                   | x         |              |                      |                    |   |
| ITDSTDRIPATSTsNTIsAGW          |               |             |           |                |                   |           |              |                      |                    |   |
| ITDSTDRIPATSTsNTIsAGW          |               |             |           |                |                   |           |              |                      |                    |   |
| <b>CD44s</b>                   |               |             |           |                |                   |           |              |                      |                    |   |
| StVHPiPEDEsPWITDSTDRIPATRDQDTf | x             |             |           | x              |                   |           |              | x                    |                    |   |
| stVHPiPEDEsPWITDsTDRIPATRDQDTf | x             |             |           | x              |                   |           |              |                      |                    |   |
| ITDsTDRIPATRDQDTf              |               |             |           |                |                   |           |              |                      |                    | x |
| stVHPiPEDESPWITDSTDRIPAtRDQDTf |               |             |           |                |                   |           |              |                      |                    |   |
| STVHPiPEDESPWITDsTDRIPATRDQDTf |               |             |           |                |                   |           |              |                      |                    |   |
| StVHPiPEDESPWITDSTDRIPAtRDQDTf |               |             |           |                |                   |           |              |                      |                    |   |
| ItDsTDRIPATRDQDTf              |               |             |           |                |                   |           |              |                      |                    |   |
| stVHPiPEDEsPWITDsTDRIPATRDQDTf |               |             |           |                |                   |           |              |                      |                    |   |
| ITDsTDRIPAtRDQDTf              |               |             |           |                |                   |           |              |                      |                    |   |
| ItDsTDRIPAtRDQDTf              |               |             |           |                |                   |           |              |                      |                    |   |
| STVHPiPEDESPWITDsTDRIPAtRDQDTf |               |             |           |                |                   |           |              |                      |                    |   |
| stVHPiPEDESPWITDsTDRIPATRDQDTf |               |             |           |                |                   |           |              |                      |                    |   |
| ItDsTDRIPAtRDQDTf              |               |             |           |                |                   |           |              |                      |                    |   |
| ITDsTDRIPAtRDQDTf              |               |             |           |                |                   |           |              |                      |                    |   |
| STVhPiPEDEsPWITDsTDRIPATRDQDTf |               |             |           |                |                   |           |              |                      |                    |   |
| STVHPiPEDEsPWITDsTDRIPATRDQDTf |               |             |           |                |                   |           |              |                      |                    |   |
| <b>CD44sol</b>                 |               |             |           |                |                   |           |              |                      |                    |   |
| qWScGGQKAKWtQRRGQVSGnGAF       |               |             |           |                |                   |           | x            |                      |                    |   |
| GEQGVVRNsRPVY                  |               |             |           |                |                   |           | x            |                      |                    |   |
| GEQGVVRNsRPVY                  | x             |             |           |                |                   |           |              |                      |                    |   |
| GEQGVVRNsRPVYDs                | x             |             |           | x              |                   |           |              |                      |                    |   |
| QWScGGQKAKW                    | x             |             |           |                |                   |           |              |                      |                    |   |
| tQRRGQVVsGNGAF                 |               |             |           | x              |                   |           |              |                      |                    |   |
| TQRRGQVVsGnGAF                 | x             |             |           |                |                   |           |              |                      |                    |   |
| etcSLHcSQSKVWAEKASDQQW         |               |             |           |                |                   |           | x            |                      | x                  |   |
| scGGQKAKWTQRRGQVVsGnGAF        | x             |             |           |                |                   |           |              |                      |                    |   |
| ETcSLHcSQSKVW                  |               |             |           |                |                   |           | x            |                      |                    |   |
| tQRRGQVVsGNGAFGEQGVVRNsRPVYDs  |               |             |           |                |                   |           | x            |                      | x                  |   |
| TQRRGQVVsGNGAF                 |               |             |           | x              |                   |           |              |                      |                    |   |
| gEQGVVRNsRPVY                  |               |             |           | x              |                   |           |              |                      |                    |   |
| scGGQKAKWTQRRGQVVsGNGAF        |               |             |           |                |                   |           |              |                      |                    |   |
| TQRRGQVVsGNGAF                 |               |             |           |                |                   |           |              |                      |                    |   |
| EtcSLHcSQSKVW                  |               |             |           |                |                   |           |              |                      | x                  |   |
| AEEKASDQQWQW                   |               |             |           |                |                   |           |              |                      |                    | x |
| ETcSLHcSQSKVWAEKASDQQWQW       |               |             |           |                |                   |           |              |                      |                    |   |
| qWScGGQKAKWTQRRGQVVsGNGAF      |               |             |           |                |                   |           |              |                      |                    |   |
| QWScGGQKAKWTQRRGQVVsGNGAF      |               |             |           |                |                   |           |              |                      |                    |   |

**Table S5. Glycopeptides identified by nanoLC-HCD/CID-MS/MS in glycoproteogenomics settings for T24 cell line.**

| Peptide sequence              | T24           |             |           |                |                   |              |                      |                    |
|-------------------------------|---------------|-------------|-----------|----------------|-------------------|--------------|----------------------|--------------------|
|                               | Glycan chains |             |           |                |                   |              |                      |                    |
|                               | HexNAc        | HexNAcNeuAc | HexHexNAc | HexHexNAcNeuAc | HexHexNAcNeuAc(2) | HexNAc(2)Hex | HexNAc(2)Hex(2)NeuAc | HexNAc(1)Hex(1)Fuc |
| <b>CD44v2-10</b>              |               |             |           |                |                   |              |                      |                    |
| LFLPSESKNHLHTTTQMAGTSnTISAGW  |               |             | x         |                |                   | x            |                      |                    |
| IPsEsKNHLHTTTQMAGTSSNTISAGW   | x             |             | x         |                |                   |              |                      |                    |
| LFLPSESKNHLHTTTQMAGTSnTisAGW  |               |             |           |                |                   |              |                      |                    |
| LFLPSESKNHLHtttQMAGTSSnTISAGW |               |             |           |                |                   |              |                      |                    |
| DWFsW                         |               |             |           |                |                   |              |                      |                    |
| FsWLF                         |               |             |           |                |                   |              |                      | x                  |
| LFLPSESKNHLHTTTQMAGTSSNTISAGW |               |             |           |                | x                 |              |                      |                    |
| dWFsW                         |               |             |           |                |                   |              |                      |                    |
| FsWLF                         |               |             |           |                |                   | x            |                      |                    |
| LFLPSESKnHLHTTTQmAGTSSnTISAGW |               |             |           |                |                   |              | x                    |                    |
| fsWLF                         |               |             |           |                |                   |              |                      |                    |
| FsWLF                         |               |             |           |                |                   | x            |                      |                    |
| LFLPSESKNHLHTTTQmAGTSSNTisAGW |               |             |           |                |                   |              |                      |                    |
| DWFsW                         |               |             |           |                |                   |              |                      |                    |
| LFLPsEsKNHLHTTTQmAGTSSNTISAGW |               |             |           |                |                   | x            |                      |                    |
| LPsEsKNHLHTTTQMAGTSSNTISAGW   |               |             |           |                |                   |              |                      |                    |
| LPSESKNHLHTTTQMAGTSSNTisAGW   |               |             |           |                | x                 |              |                      | x                  |
| LFLPsESKNHLHTTTQmAGTSSNTISAGW |               | x           |           |                |                   |              |                      |                    |
| LFLPSESKnHLHtttQMAGTSSNTISAGW |               |             |           |                |                   | x            | x                    |                    |
| LPSESKnHLHtttQMAGTSSNTISAGW   | x             |             | x         |                |                   |              | x                    |                    |
| LPSESKnHLHTttQMAGTSSNTISAGW   |               |             |           |                |                   |              | x                    |                    |
| LPSESKnHLHTttQMAGTSSNTISAGW   |               |             |           |                |                   |              | x                    |                    |
| LPSESKNHLHTTTQmAGTSSNTISAGW   |               |             |           |                |                   |              |                      | x                  |
| LFLPsESKNHLHTTTQMAGTSSNTISAGW |               | x           |           |                |                   |              |                      | x                  |
| LFLPSEsKNHLHTTTQmAGTSSNTISAGW |               |             | x         |                |                   |              |                      |                    |
| LFLPsEsKNHLHTTTQmAGTSSNTISAGW | x             |             |           |                |                   |              |                      |                    |
| LPSESKNHLHTTTQmAGTSSNTISAGW   |               | x           |           |                |                   |              |                      |                    |
| sWLF                          |               |             |           |                |                   |              |                      | x                  |
| sWLF                          |               |             |           |                |                   |              | x                    |                    |
| FsWLF                         |               |             |           | x              |                   |              |                      |                    |
| LFLPsESKnHLHTTTQMAGTSSNTISAGW |               |             |           |                |                   |              |                      |                    |
| STVHPIPEDSPWITDsTDRIpAtRDQDTf |               |             |           |                |                   |              |                      |                    |
| dWFsW                         |               |             |           |                |                   |              |                      |                    |
| sWLF                          |               |             |           |                |                   |              |                      |                    |
| FsWLF                         |               |             |           |                |                   |              |                      |                    |
| DWFsW                         |               |             |           |                |                   |              |                      |                    |
| FsWLF                         |               |             |           |                |                   |              |                      |                    |
| DWFsW                         |               |             |           |                |                   |              |                      |                    |
| <b>CD44v3-10</b>              |               |             |           |                |                   |              |                      |                    |
| ITDSTDRIpATsSSnTISAGW         |               |             |           |                |                   | x            |                      |                    |
| ITDSTDRIpATsTSSNTISAGW        | x             |             |           |                |                   |              | x                    |                    |
| ITDSTDRIpATsTSSNTISAGW        |               |             | x         |                |                   |              |                      |                    |
| ITDSTDRIpATsSNTisAGW          |               |             |           |                |                   |              |                      |                    |
| ITDStDRIPATsTssNTisAGW        |               |             |           |                |                   |              |                      |                    |
| ITDStDRIPATsTSSNTisAGW        |               |             |           |                |                   |              |                      |                    |
| iTDDTDRIpATsTSSNTISAGW        |               |             |           |                |                   |              |                      |                    |
| iTDDTDRIpATsTSSNTisAGW        |               |             |           |                |                   |              |                      |                    |
| ITDSTDRIpATsTSSnTisAGW        |               |             |           |                |                   |              |                      |                    |
| ITDSTDRIpATsTssnTisAGW        |               |             |           |                |                   |              |                      |                    |
| ITDSTDRIpATsTssnTisAGW        |               |             |           |                |                   |              |                      |                    |
| ITDSTDRIpATsTssnTisAGW        |               |             |           |                |                   |              |                      |                    |
| ITDSTDRIpATsTssnTisAGW        |               |             |           |                |                   |              |                      |                    |
| <b>CD44s</b>                  |               |             |           |                |                   |              |                      |                    |
| StVHPIPEDsPWITDsTDRIpAtRDQDTf | x             |             | x         |                |                   |              | x                    |                    |
| stVHPIPEDsPWITDsTDRIpAtRDQDTf | x             |             | x         |                |                   |              |                      |                    |
| ITDStDRIPAtRDQDTf             |               |             |           |                |                   |              |                      | x                  |
| stVHPIPEDsPWITDsTDRIpAtRDQDTf |               |             | x         |                |                   |              | x                    |                    |
| STVHPIPEDsPWITDsTDRIpAtRDQDTf |               | x           |           |                |                   |              |                      | x                  |
| StVHPIPEDsPWITDsTDRIpAtRDQDTf | x             |             | x         |                |                   |              | x                    |                    |
| ItDsTDRIpAtRDQDTf             |               |             |           |                |                   | x            |                      |                    |
| stVHPIPEDsPWITDsTDRIpAtRDQDTf |               | x           |           |                |                   |              |                      | x                  |
| ITDStDRIPAtRDQDTf             |               | x           |           |                |                   |              |                      | x                  |
| ITDStDRIPAtRDQDTf             |               |             |           |                | x                 |              |                      |                    |
| STVHPIPEDsPWITDsTDRIpAtRDQDTf |               |             |           |                |                   |              |                      |                    |
| stVHPIPEDsPWITDsTDRIpAtRDQDTf | x             |             |           |                |                   | x            |                      |                    |
| ItDStDRIPAtRDQDTf             |               |             |           |                |                   |              |                      |                    |
| ITDStDRIPAtRDQDTf             |               |             |           |                |                   |              |                      |                    |
| STVhPIPEDsPWITDsTDRIpAtRDQDTf |               |             |           |                |                   |              |                      |                    |
| STVHPIPEDsPWITDsTDRIpAtRDQDTf |               |             |           |                |                   |              |                      |                    |
| <b>CD44sol</b>                |               |             |           |                |                   |              |                      |                    |
| qWScGGQKAKWtQRRGQVSGnGAF      |               |             |           |                |                   |              |                      |                    |
| GEQGVVRNsRPVY                 |               |             |           |                |                   |              |                      |                    |
| GEQGVVRNsRPVY                 | x             |             |           |                |                   |              |                      |                    |
| GEQGVVRNsRPVYDs               |               |             |           |                |                   |              |                      |                    |
| QWScGGQKAKW                   |               |             |           |                |                   |              |                      |                    |
| tQRRGQVSGnGAF                 |               |             |           |                |                   |              |                      |                    |
| TQRRGQVSGnGAF                 |               |             |           |                |                   |              |                      |                    |
| etcSLHcSQSKKVVWAEKASDQQW      |               |             |           |                |                   | x            | x                    |                    |
| scGGQKAKWTQRRGQVSGnGAF        | x             |             |           |                |                   |              |                      |                    |
| ETcSLHcSQSKKVV                |               |             |           |                |                   |              |                      |                    |
| tQRRGQVSGnGAFGEQGVVRNsRPVYDs  |               |             |           |                |                   |              |                      |                    |
| TQRRGQVSGnGAF                 |               |             |           |                |                   |              |                      |                    |
| gEQGVVRNsRPVY                 |               |             | x         |                |                   |              |                      |                    |
| scGGQKAKWTQRRGQVSGnGAF        |               |             |           |                |                   |              |                      | x                  |
| TQRRGQVSGnGAF                 |               |             |           |                |                   |              |                      |                    |
| ETcSLHcSQSKKVV                |               |             |           | x              |                   |              |                      |                    |
| AEEKASDQQWQW                  |               |             |           |                |                   |              |                      |                    |
| ETcSLHcSQSKKVVWAEKASDQQWQW    |               | x           |           |                |                   |              |                      |                    |
| ETcSLHcSQSKKVVWAEKASDQQWQW    |               |             | x         |                |                   | x            |                      |                    |
| qWScGGQKAKWTQRRGQVSGnGAF      |               |             |           |                |                   |              |                      | x                  |
| QWScGGQKAKWTQRRGQVSGnGAF      |               | x           |           |                |                   |              |                      |                    |



**Table S6. Glycopeptides identified by nanoLC-HCD/CID-MS/MS in glycoproteogenomics settings for CD44s<sup>high</sup> MIBC showing areas of CD44 and STn co-localization.**

| Peptide sequence               | MIBC          |             |
|--------------------------------|---------------|-------------|
|                                | Glycan chains |             |
|                                | HexNAc        | HexNAcNeuAc |
| <b>CD44v2-10</b>               |               |             |
| LFLPSESKNHLHTTTQMAGTSsNTISAGW  |               |             |
| IPsEsKNHLHTTTQMAGTSSNTISAGW    |               |             |
| LFLPSESKNHLHTTTQMAGTSsNTISAGW  |               |             |
| LFLPSESKNHLHttQMAGTSSnTISAGW   |               |             |
| DWFsW                          |               |             |
| FsWLF                          |               |             |
| LFLPSESKNHLHTTTQMAGTSSNTISAGW  |               |             |
| dWFsW                          |               |             |
| FsWLF                          |               |             |
| LFLPSESKnHLHTTTQmAGtSSnTISAGW  |               |             |
| fsWLF                          |               |             |
| FsWLF                          |               |             |
| LFLPSESKNHLHTTTQmAGtSSNTISAGW  |               |             |
| DWFsW                          |               |             |
| LFLPsEsKNHLHTTTQmAGTSSNTISAGW  |               |             |
| LPsEsKNHLHTTTQMAGTSSNTISAGW    |               |             |
| LPSESKNHLHTTTQMAGTSSNTISAGW    |               |             |
| LFLPsESKNHLHTTTQmAGTSSNTISAGW  |               |             |
| LFLPSESKnHLHttQMAGTSSNTISAGW   |               |             |
| LPSESKnHLHttQMAGTSSNTISAGW     |               |             |
| LPSESKnHLHttQMAGTSSNTISAGW     |               |             |
| LPSESKNHLHTTTQmAGTSSNTISAGW    |               |             |
| LFLPsESKNHLHTTTQMAGTSSNTISAGW  |               |             |
| LFLPsEsKNHLHTTTQmAGTSSNTISAGW  |               |             |
| LPSESKNHLHTTTQmAGTSSNTISAGW    | x             |             |
| sWLF                           | x             |             |
| sWLF                           |               |             |
| FsWLF                          |               |             |
| LFLPsESKnHLHTTTQMAGTSSNTISAGW  | x             | x           |
| STVHPIPDEdSPWITDsTDRIpAtRDQDTf |               |             |
| dWFsW                          |               |             |
| sWLF                           |               | x           |
| FsWLF                          | x             |             |
| DWFsW                          | x             |             |
| FsWLF                          |               | x           |
| DWFsW                          |               | x           |
| <b>CD44v3-10</b>               |               |             |
| ITDSTRIPATSTSSnTISAGW          |               |             |
| ITDSTRIPATStSSNTISAGW          |               |             |
| ITDSTRIPATStSSNTISAGW          |               |             |
| ITDSTRIPATSTSSnTISAGW          |               |             |
| ITDSTRIPATSTSSnTISAGW          |               |             |
| ITDSTRIPATSTSSnTISAGW          |               |             |
| ITDSTRIPATSTSSnTISAGW          |               |             |
| ITDSTRIPATSTSSnTISAGW          |               |             |
| ITDSTRIPATStSSnTISAGW          |               |             |
| ITDSTRIPATSTSSnTISAGW          |               |             |
| ITDSTRIPATSTSSnTISAGW          | x             | x           |
| ITDSTRIPATSTSSnTISAGW          |               | x           |
| ITDSTRIPATSTSSnTISAGW          | x             |             |
| <b>CD44s</b>                   |               |             |
| StVHPIPDEdSPWITDsTDRIpAtRDQDTf |               |             |
| stVHPIPDEdSPWITDsTDRIpAtRDQDTf |               |             |
| ITDsTDRIpAtRDQDTf              |               |             |
| stVHPIPDEdSPWITDsTDRIpAtRDQDTf |               |             |
| StVHPIPDEdSPWITDsTDRIpAtRDQDTf |               |             |
| ItDsTDRIpAtRDQDTf              |               |             |
| stVHPIPDEdSPWITDsTDRIpAtRDQDTf |               |             |
| ITDsTDRIpAtRDQDTf              |               |             |
| ITDsTDRIpAtRDQDTf              | x             |             |
| STVHPIPDEdSPWITDsTDRIpAtRDQDTf | x             |             |
| stVHPIPDEdSPWITDsTDRIpAtRDQDTf |               |             |
| ItDsTDRIpAtRDQDTf              |               | x           |
| ITDsTDRIpAtRDQDTf              | x             | x           |
| STVhPIPDEdSPWITDsTDRIpAtRDQDTf |               | x           |
| STVHPIPDEdSPWITDsTDRIpAtRDQDTf | x             | x           |
| <b>CD44sol</b>                 |               |             |
| qWScGGQKAKWTQRRGQQVsGnGAF      |               |             |
| GEQGVVRNsRPVY                  |               |             |
| GEQGVVRNsRPVY                  | x             |             |
| GEQGVVRNsRPVYDs                |               |             |
| QWScGGQKAKW                    |               |             |
| tQRRGQQVsGnGAF                 |               |             |
| TQRRGQQVsGnGAF                 |               |             |
| etcSLHcSQSKVWAEKASDQQW         |               |             |
| scGGQKAKWTQRRGQQVsGnGAF        | x             |             |
| ETcSLHcSQSKVW                  |               |             |
| tQRRGQQVsGnGAFGEQGVVRNsRPVYDs  |               |             |
| TQRRGQQVsGnGAF                 |               |             |
| gEQGVVRNsRPVY                  |               | x           |
| scGGQKAKWTQRRGQQVsGnGAF        |               |             |
| TQRRGQQVsGnGAF                 |               |             |
| EtcSLHcSQSKVW                  |               |             |
| AEEKASDQQWQW                   |               |             |
| ETcSLHcSQSKVWAEKASDQQWQW       |               |             |
| qWScGGQKAKWTQRRGQQVsGnGAF      |               |             |
| QWScGGQKAKWTQRRGQQVsGnGAF      |               | x           |

**Table S7. Glycopeptides identified by nanoLC-HCD/CID-MS/MS in glycoproteogenomics settings for T24 CIGALT1 KO cell model.**

| Peptide sequence               | T24 C1GALT1 KO |             |           |
|--------------------------------|----------------|-------------|-----------|
|                                | Glycan chains  |             |           |
|                                | HexNAc         | HexNAcNeuAc | HexNAc(2) |
| <b>CD44v2-10</b>               |                |             |           |
| LFLPSEKNHLHTTTQMAGTSsNTISAGW   |                |             |           |
| IPsEsKNHLHTTTQMAGTSSNTISAGW    |                |             |           |
| LFLPSEKNHLHttTQMAGTSsNTISAGW   |                |             |           |
| LFLPSEKNHLHttQMAGTSSnTISAGW    |                |             |           |
| DWFsW                          |                |             |           |
| FsWLF                          |                |             |           |
| LFLPSEKNHLHTTTQMAGTSSNTISAGW   |                |             |           |
| dWFsW                          |                |             |           |
| FsWLF                          |                |             |           |
| LFLPSEKnhLHTTTQmAGtSSnTISAGW   |                |             |           |
| fsWLF                          |                |             |           |
| FsWLF                          |                |             |           |
| LFLPSEKNHLHttTQmAGtSSNTISAGW   |                |             |           |
| DWFsW                          |                |             |           |
| LFLPsEsKNHLHTTTQmAGTSSNTISAGW  |                |             |           |
| LPsEsKNHLHTTTQMAGTSSNTISAGW    |                |             |           |
| LPSEKNHLHttTQMAGTSSNTISAGW     |                |             |           |
| LFLPsESKNHLHTTTQmAGTSSNTISAGW  |                |             |           |
| LFLPSEKnhLHttQMAGTSSNTISAGW    |                |             |           |
| LPSEKnhLHttQMAGTSSNTISAGW      |                |             |           |
| LPSEKnhLHttQMAGTSSNTISAGW      |                |             |           |
| LPSEKnhLHttQMAGTSSNTISAGW      |                |             |           |
| LPSEKnhLHttQMAGTSSNTISAGW      |                |             |           |
| LFLPsESKNHLHTTTQMAGTSSNTISAGW  |                |             |           |
| LFLPsEsKNHLHTTTQmAGTSsNTISAGW  |                |             |           |
| LFLPsEsKNHLHTTTQmAGTSSNTISAGW  | x              |             |           |
| LPSEKnhLHttTQmAGTSSNTISAGW     |                |             |           |
| sWLF                           |                |             |           |
| sWLF                           |                |             |           |
| FsWLF                          |                |             |           |
| LFLPsESKnhLHttTQMAGTSSNTISAGW  | x              | x           |           |
| STVHPIPEDESPWITDsTRIPAtRDQDTf  | x              |             |           |
| dWFsW                          |                |             |           |
| sWLF                           |                |             |           |
| FsWLF                          |                |             |           |
| DWFsW                          |                |             |           |
| FsWLF                          |                |             |           |
| DWFsW                          |                |             |           |
| <b>CD44v3-10</b>               |                |             |           |
| ItDSTRIPATSTSSnTISAGW          |                |             |           |
| ItDSTRIPAtStSSNTISAGW          |                |             |           |
| ITDSTRIPATStSSNTISAGW          |                |             |           |
| ITDSTRIPATSTsNTISAGW           |                |             |           |
| ITDStDRIPATSTsNTISAGW          |                |             |           |
| ITDStDRIPATSTsNTISAGW          |                |             |           |
| iTDSTRIPATSTsNTISAGW           |                |             |           |
| iTDSTRIPATSTSSnTISAGW          |                |             |           |
| ITDSTRIPATStSSnTISAGW          |                |             |           |
| ITDSTRIPATSTsNTISAGW           |                |             |           |
| ITDSTRIPATSTSSnTISAGW          |                |             |           |
| ITDSTRIPATStSSnTISAGW          |                |             |           |
| ITDSTRIPATSTsNTISAGW           |                |             |           |
| ITDSTRIPATSTSSnTISAGW          |                |             |           |
| ITDSTRIPATSTSSnTISAGW          |                |             |           |
| ITDSTRIPATSTSSnTISAGW          |                |             |           |
| ITDSTRIPATSTSSnTISAGW          |                |             |           |
| <b>CD44s</b>                   |                |             |           |
| StVHPIPEDEsPWITDsTRIPATRDQDTf  |                |             |           |
| stVHPIPEDEsPWITDsTRIPATRDQDTf  |                |             |           |
| ITDStDRIPATRDQDTf              |                |             |           |
| sTVHPIPEDESPWITDsTRIPAtRDQDTf  |                |             |           |
| StVHPIPEDESPWITDsTRIPATRDQDTf  |                |             |           |
| StVHPIPEDESPWITDsTRIPAtRDQDTf  |                |             |           |
| ItDsTRIPATRDQDTf               |                |             |           |
| sTVHPIPEDEsPWITDsTRIPATRDQDTf  |                |             |           |
| ITDStDRIPAtRDQDTf              |                |             |           |
| ItDsTRIPAtRDQDTf               | x              |             |           |
| STVHPIPEDESPWITDsTRIPAtRDQDTf  | x              |             |           |
| sTVHPIPEDESPWITDsTRIPATRDQDTf  |                |             |           |
| ItDsTRIPAtRDQDTf               |                |             |           |
| ITDStDRIPAtRDQDTf              |                |             |           |
| STVhPIPEDESPWITDsTRIPATRDQDTf  |                |             |           |
| STVHPIPEDEsPWITDStDRIPAtRDQDTf |                |             |           |
| <b>CD44sol</b>                 |                |             |           |
| qWScGGQKAKWtQRRGQQVSGnGAF      |                |             |           |
| GEQGVVRNsRPVY                  |                |             |           |
| GEQGVVRNsRPVY                  |                |             |           |
| GEQGVVRNsRPVYDs                |                |             |           |
| QWScGGQKAKW                    |                |             |           |
| tQRRGQQVsGNGAF                 |                |             |           |
| TQRRGQQVsGnGAF                 | x              |             |           |
| etcSLHcSQSKKVVAAEKAQDQW        |                |             |           |
| scGGQKAKWtQRRGQQVsGnGAF        | x              |             |           |
| ETcSLHcSQSKKVV                 |                |             |           |
| tQRRGQQVSGNGAFGEQGVVRNsRPVYDs  |                |             |           |
| TQRRGQQVsGNGAF                 |                |             | x         |
| gEQGVVRNsRPVY                  |                |             |           |
| scGGQKAKWtQRRGQQVSGNGAF        |                |             |           |
| TQRRGQQVsGNGAF                 |                |             |           |
| EtcSLHcSQSKKVV                 |                |             |           |
| AEEKAsDQQWQW                   |                |             |           |
| ETcSLHcSQSKKVVAAEKAQDQWQW      |                |             |           |
| qWScGGQKAKWtQRRGQQVsGNGAF      |                |             |           |
| QWScGGQKAKWtQRRGQQVsGNGAF      |                |             |           |
